# Supplementary material for: Global Mapping of Coastal Compound Flood Risk at 11 km Resolution
Source: Research Square preprint supplement (doi:10.21203/rs.3.rs-7162136/v1), 2025-08-04
Supplement: Supplementary file 1 [file 3ff4d5a741fdf02fa122ec91.pdf]

## 886 **Supplementary Information**

### 887 **Supplementary Data**

888 Supplementary Data ([Table\\_S1\\_Subcountry\\_rankingofCCFR6.0.xlsx](#)) provide information  
889 of CCFH (volume, depth, surface area of riverine, oceanic, and compunding hazard), CCFR  
890 (exposure, vulnerability, and compunding risk), and other indicators at a 11 km resolution for  
891 the globe. Each indicator can be ranked in either ascending or descending order of magnitude.

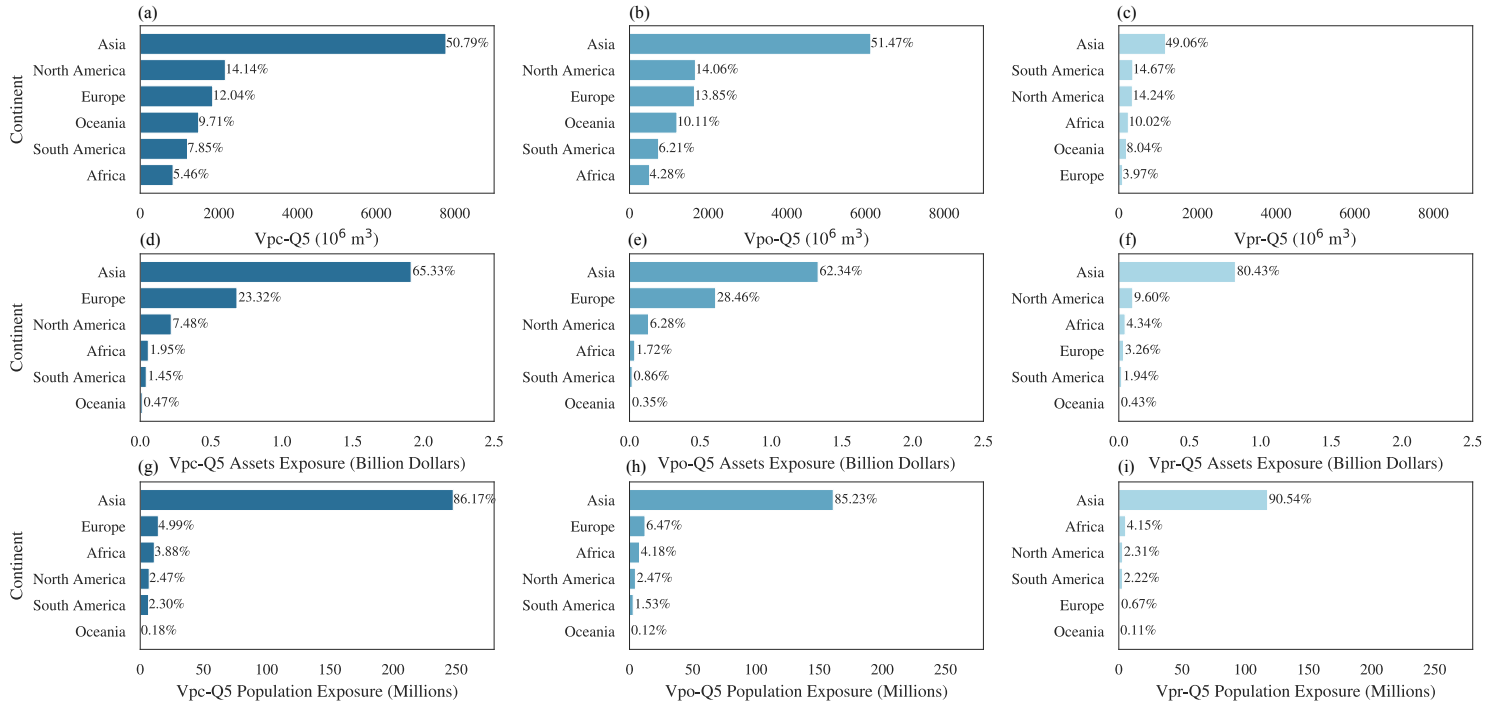

Figure S1: **Population and assets exposed to coastal compound ( $V_{pc}$ ), riverine ( $V_{pr}$ ), and oceanic ( $V_{po}$ ) floods at the continent scale.** (a-c) continent rankings based on the share of high (the fifth quantile)  $V_{pc}$ ,  $V_{po}$ , and  $V_{pr}$ ; (d-f) continent rankings based on the share of assets exposed to high  $V_{pc}$ ,  $V_{po}$ , and  $V_{pr}$ ; (g-i) continent rankings based on the share of population exposed to high  $V_{pc}$ ,  $V_{po}$ , and  $V_{pr}$ .

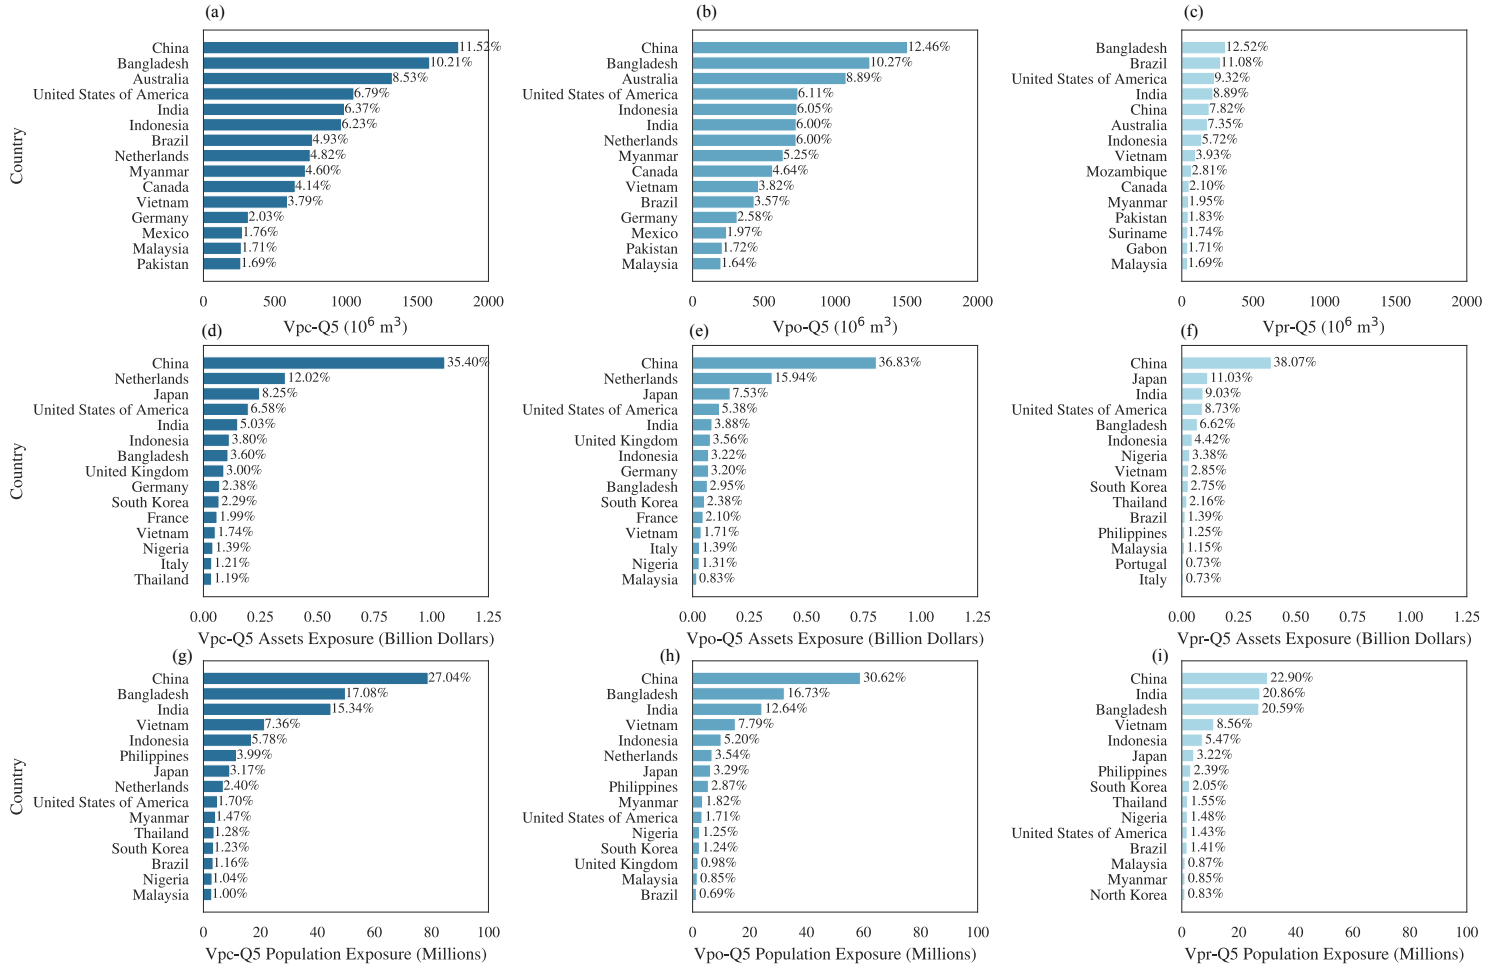

Figure S2: Population and assets exposed to coastal compound ( $V_{pc}$ ), riverine ( $V_{pr}$ ), and oceanic ( $V_{po}$ ) flood volumetric hazard at the country scale. (a-c) country rankings based on the share of high (the fifth quantile)  $V_{pc}$ ,  $V_{pc}$ , and  $V_{pc}$ ; (d-f) country rankings based on the share of assets exposed to high  $V_{pc}$ ,  $V_{pc}$ , and  $V_{pc}$ ; (g-i) country rankings based on the share of population exposed to high  $V_{pc}$ ,  $V_{pc}$ , and  $V_{pc}$ .

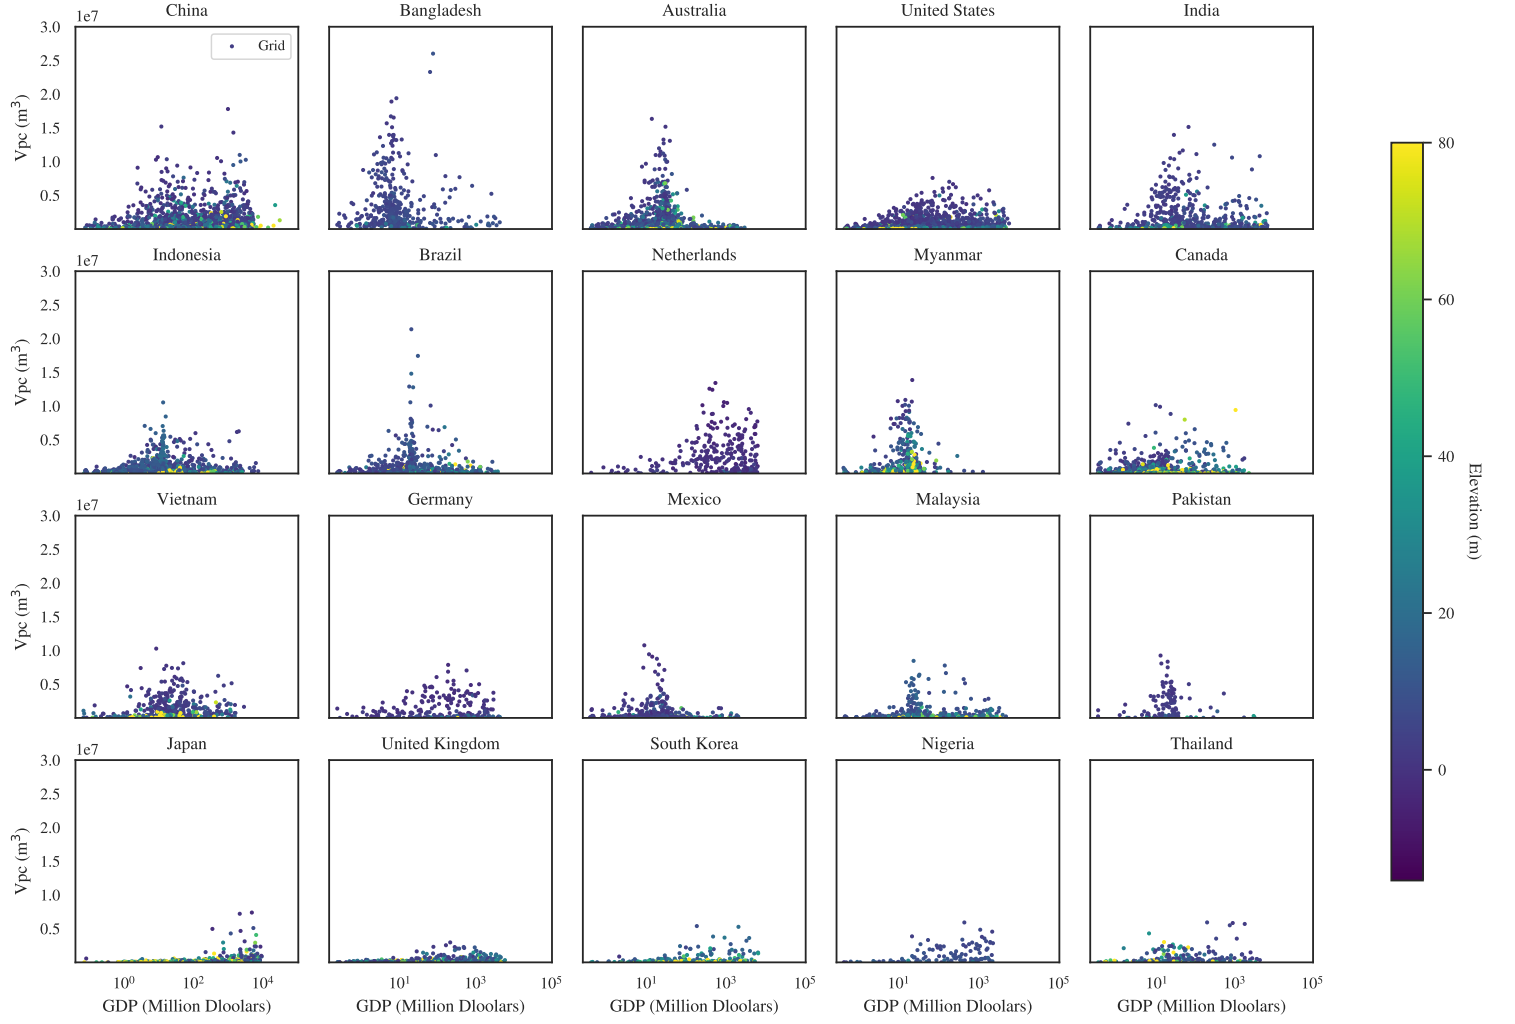

Figure S3: **CCFH-GDP pattern for the top 20 CCFH countries at  $0.1^\circ \times 0.1^\circ$  grid scale.** The colors of the points is proportional to the elevation. Country's patterns are shown from the highest to the lowest CCFH (from top left to bottom right)
